# Supplementary material for: Toward regulating biodegradation in stages of polyurethane copolymers with bicontinuous microphase separation
Source: Royal Society of Chemistry journal article supplement (doi:10.1039/d3tb00011g), 2023-01-01
Supplement: d3tb00011g1.pdf [file d3tb00011g1.pdf]

## Supporting information

### **Toward Regulating Biodegradation in Stages of Polyurethane Copolymer with Bicontinuous Microphase Separation**

Man Wang <sup>a</sup>, Hong-ying Liu <sup>b</sup>, Neng-wen Ke <sup>b\*</sup>, Gang Wu <sup>a</sup>, Si-chong Chen <sup>a\*</sup>, Yu-zhong Wang <sup>a</sup>

<sup>a</sup> The Collaborative Innovation Center for Eco-Friendly and Fire-Safety Polymeric Materials (MoE), National Engineering Laboratory of Eco-Friendly Polymeric Materials (Sichuan), College of Chemistry, State Key Laboratory of Polymer Materials Engineering, Sichuan University, Chengdu 610064, China.

<sup>b</sup> Department of Pancreatic Surgery, West China Hospital, Sichuan University / West China School of Nursing, Sichuan University.

\*Corresponding authors: [kenengwen@scu.edu.cn](mailto:kenengwen@scu.edu.cn) (N.-W. Ke),  
[chensichong@scu.edu.cn](mailto:chensichong@scu.edu.cn) (S.-C. Chen)

## Experimental section

**Synthesis of HO-PPDO<sub>41.15%</sub>-c-PCL-OH.** The predetermined amounts of PDO,  $\epsilon$ -CL and BDO (as specified in the polymerization Table 1) were charged into a rigorously dried two-necked flask, then the reactor was immersed into a preheated oil bath ( $T=140\text{ }^{\circ}\text{C}$ ), a predetermined amount of stannous octoate toluene solution ( $0.5\text{ mol L}^{-1}$ , the molar ratio of overall monomer and  $\text{Sn}(\text{Oct})_2$  was 10000:1) was injected into the reactor to perform the reaction for 48h. After reaction, the reactor was cooled to room temperature. The crude product was purified by dissolving in  $\text{CHCl}_3$  and then precipitated into excess of cold methanol, filtered, washed thrice with methanol to remove unreacted monomer, and dried in a vacuum oven at  $40\text{ }^{\circ}\text{C}$  to a constant weight.

$^1\text{H}$  NMR (400 MHz,  $\text{CDCl}_3$ , RT)  $\delta$  4.26 (t,  $J = 4.6\text{ Hz}$ , 2H;  $-\text{C}(\text{O})\text{CH}_2\text{OCH}_2\text{CH}_2\text{O}-$ ; PDO), 4.15 (t,  $J = 6.7\text{ Hz}$ , 2H;  $-\text{CH}_2\text{O}-$ ; CL\*-PDO), 4.12 (s, 2H;  $-\text{C}(\text{O})\text{CH}_2\text{OCH}_2\text{CH}_2\text{O}-$ ; PDO), 4.05 (t,  $J = 6.7\text{ Hz}$ , 2H;  $-\text{CH}_2\text{O}-$ ; CL), 3.77 (t,  $J = 4.7\text{ Hz}$ , 2H;  $-\text{C}(\text{O})-\text{CH}_2\text{OCH}_2\text{CH}_2\text{O}-$ ; PDO), 2.36 (t,  $J = 7.5\text{ Hz}$ , 2H;  $-\text{C}(\text{O})\text{CH}_2-$ ; CL\*-PDO), 2.29 (t,  $J = 7.5\text{ Hz}$ , 2H;  $-\text{C}(\text{O})\text{CH}_2-$ ; CL), 1.65-1.60 (m, 4H;  $-\text{C}(\text{O})\text{CH}_2\text{CH}_2-$  and  $-\text{CH}_2\text{CH}_2\text{O}-$ ; CL), 1.40-1.30 (m, 2H;  $\text{CH}_2$ ; CL).

$^{13}\text{C}$  NMR (100 MHz,  $\text{CDCl}_3$ , RT)  $\delta$  173.65, 173.6 and 173.5 ( $-\text{C}(\text{O})-$ ; CL), 170.3 ( $-\text{C}(\text{O})-$ ; PDO), 69.7 ( $-\text{C}(\text{O})-\text{CH}_2\text{OCH}_2\text{CH}_2\text{O}-$ ; PDO), 68.5 ( $-\text{C}(\text{O})\text{CH}_2\text{OCH}_2\text{CH}_2\text{O}-$ ; PDO), 64.8 ( $-\text{CH}_2\text{O}-$ ; CL\*-PDO), 64.3 ( $-\text{CH}_2\text{O}-$ ; CL-CL), 63.4 ( $-\text{C}(\text{O})\text{CH}_2\text{OCH}_2\text{CH}_2\text{O}-$ ; PDO), 34.3, 34.2 and 34.1 ( $-\text{C}(\text{O})\text{CH}_2-$ ; CL) 28.5, 28.4, 25.7, 25.6, 24.7 and 24.6 ( $-\text{CH}_2$ ; CL).

**Synthesis of HO-PCL-OH.** The predetermined amounts of  $\epsilon$ -CL and BDO were charged into a rigorously dried two-necked flask, then the reactor was immersed into a preheated oil bath ( $T=130\text{ }^{\circ}\text{C}$ ), a predetermined amount of stannous octoate toluene solution ( $0.5\text{ mol L}^{-1}$ , the molar ratio of overall monomer and  $\text{Sn}(\text{Oct})_2$  was 10000:1) was injected into the reactor to perform the reaction for 48h. After reaction, the reactor was cooled to room temperature. The crude product was purified by dissolving in  $\text{CHCl}_3$  and then precipitated into excess of cold methanol, filtered, washed thrice with methanol to remove unreacted monomer, and dried in a vacuum oven at  $40\text{ }^{\circ}\text{C}$  to a constant weight.<sup>1</sup>

$^1\text{H}$  NMR (400 MHz, Chloroform-*d*, RT)  $\delta$  4.05 (t,  $J = 6.7$  Hz, 2H;  $-\text{CH}_2\text{O}-$ ), 2.30 (t,  $J = 7.5$  Hz, 2H;  $-\text{C}(\text{O})\text{CH}_2-$ ), 1.67-1.60 (m, 4H;  $-\text{C}(\text{O})\text{CH}_2\text{CH}_2-$  and  $-\text{CH}_2\text{CH}_2\text{O}-$ ), 1.41-1.33 (m, 2H;  $\text{CH}_2$ ).

$^{13}\text{C}$  NMR (400 MHz, Chloroform-*d*, RT)  $\delta$  173.54 ( $-\text{C}(\text{O})-$ ), 64.14( $-\text{CH}_2\text{O}-$ ), 34.12( $-\text{C}(\text{O})\text{CH}_2-$ ), 28.35, 25.53, 24.58( $-\text{CH}_2$ ).

The number-average molecular weights of HO-PPDO<sub>41.15%</sub>-*c*-PCL-OH (around 5000g/mol) and HO-PCL-OH (around 5400g/mol), which are very close to the theoretical value, are calculated from nuclear magnetic resonance (NMR) spectroscopy analysis via the following equation, respectively.

$$M_n(\text{HO-PPDO}_{41.15\%}\text{-c-PCL-OH}) = 102 \times I_{3.78} / I_{3.66} \times 2 + 114 \times I_{2.56} / I_{3.66} \times 2 + 90 \quad (1)$$

$$M_n(\text{HO-PCL-OH}) = 114 \times I_{2.56} / I_{3.66} \times 2 + 90 \quad (2)$$

where  $I_{3.76}$  and  $I_{3.66}$  are the peak integrations of the corresponding methylene protons of HO-PPDO-OH connected to ester bonds and hydroxyl groups, respectively; where  $I_{2.56}$  and  $I_{3.66}$  are the peak integrations of the corresponding methylene protons of HO-PCL-OH connected to ester bonds and hydroxyl groups, respectively; and 114, 102, and 90 are the molecular weights of caprolactone, PDO, and BDO, respectively.<sup>2</sup>

Copolymer randomness was evaluated by determining the sequence distribution in each copolymer. Therefore, the degree of randomness ( $R$ )<sup>3</sup> of the copolymer chains can be calculated from the equation below:

$$R = 100/L_{\text{PDO}} + 100/L_{\text{CL}}$$

$$L_{\text{PDO}} = I_{\text{PDO-PDO}^*} / I_{\text{CL-PDO}^*} + 1$$

$$L_{\text{CL}} = I_{\text{CL-CL}^*} / I_{\text{PDO-CL}^*} + 1$$

where  $I_{\text{PDO-PDO}^*}$  (4.35-4.40ppm) and  $I_{\text{CL-PDO}^*}$  (4.25-4.30ppm) indicate the peak intensity of PDO-PDO\* and CL-PDO\* sequences of the copolymer calculated from  $^1\text{H}$  NMR, and  $I_{\text{CL-CL}^*}$  (2.25-2.33ppm) and  $I_{\text{PDO-CL}^*}$  (2.33-2.39ppm) represent the peak intensity of CL-CL\* and PDO-CL\* sequences of the copolymer determined by  $^1\text{H}$  NMR.

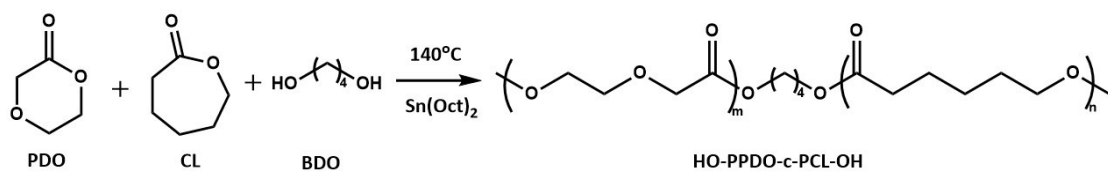

**Table S1:** Ring-opening polymerization results of prepolymer.

| Prepolymer                       | PDO (mol) | CL (mol) | [M]/[Cat.]/[I] | Conv.-PDO <sup>a</sup> (%) | Conv.-CL <sup>a</sup> (%) | $M_n$<br><sup>b</sup> (Da) | $\mathcal{D}^b$ |
|----------------------------------|-----------|----------|----------------|----------------------------|---------------------------|----------------------------|-----------------|
| HO-PPDO <sub>41%</sub> -C-PCL-OH | 0.5       | 0.5      | 1:10000:40     | 73.2                       | 81.1                      | 5031                       | 1.31            |
| HO-PCL-OH                        | 0         | 1.0      | 1:10000:40     | --                         | 79.3                      | 5392                       | 1.37            |

<sup>a</sup>Monomer conversion measured by <sup>1</sup>H NMR of the quenched solution. <sup>b</sup>Number-average molecular weight ( $M_n$ ) and dispersity index ( $\mathcal{D}=M_w/M_n$ ), determined by gel permeation chromatography (GPC) at 30°C in CHCl<sub>3</sub>.

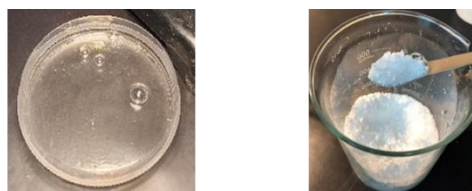

**Fig S1.** The photographs of the original HO-PPDO<sub>41.15%</sub>-c-PCL-OH (left) and HO-PCL-OH (right).

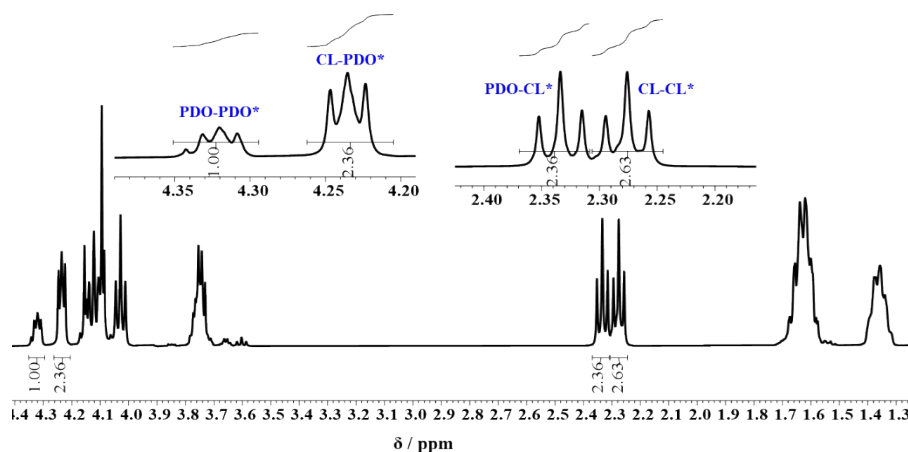

**Fig S2.** The <sup>1</sup>H NMR spectra of HO-P(DO<sub>41.15%</sub>-c-CL)-OH.

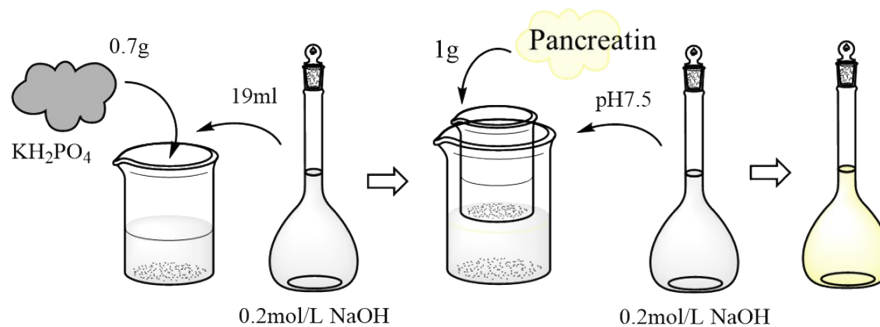

**Fig S3:** The schematic diagram of preparing Artificial pancreatic juice.

**Table S2:** Chemical Composition and Molecular Characteristics of PCL-b-CrP-U.

| Samples                    | $P^1$ (g) | $P^2$ (g) | PDO (%) | PCL (%) | $M_n^b$ (Da) | $\mathcal{D}^b$ |
|----------------------------|-----------|-----------|---------|---------|--------------|-----------------|
| PCL-U                      | 0         | 30.00     | 0       | 100     | 68582        | 1.53            |
| PCL-b-CrP <sub>10</sub> -U | 12.12     | 20.00     | 9.25    | 90.75   | 59431        | 1.46            |
| PCL-b-CrP <sub>20</sub> -U | 19.91     | 10.00     | 21.15   | 78.85   | 60371        | 1.40            |
| PCL-b-CrP <sub>25</sub> -U | 48.84     | 20.00     | 25.34   | 74.66   | 53590        | 1.52            |

<sup>1</sup>Prepolymer: HO-P(DO<sub>41.15%</sub>-c-CL)-OH; <sup>2</sup>Prepolymer: HO-PCL-OH; <sup>b</sup>Number-average molecular weight ( $M_n$ ) and dispersity index ( $\mathcal{D}=M_w/M_n$ ), determined by gel permeation chromatography (GPC) at 30°C in CHCl<sub>3</sub>.

**Table S3:** The FT-IR spectrum of PCL-b-CrP-U samples mainly shows the peak attribution table.

| Samples                    | -NH<br>(stretching<br>bands) | C=O  | -C-<br>NH- | -CH <sub>2</sub> | -CH <sub>3</sub> | -NH<br>(bending<br>vibrations) | C-O-C              |
|----------------------------|------------------------------|------|------------|------------------|------------------|--------------------------------|--------------------|
| PCL-U                      | 3324                         | 1721 | 1469       | 2942             | 2865             | 1530                           | --                 |
| PCL-b-CrP <sub>10</sub> -U | 3323                         | 1721 | 1469       | 2942             | 2865             | 1535                           | 1240/11<br>88/1104 |
| PCL-b-CrP <sub>20</sub> -U | 3323                         | 1722 | 1462       | 2942             | 2865             | 1535                           | 1240/11<br>88/1104 |
| PCL-b-CrP <sub>25</sub> -U | 3323                         | 1722 | 1460       | 2941             | 2865             | 1535                           | 1240/11<br>88/1104 |

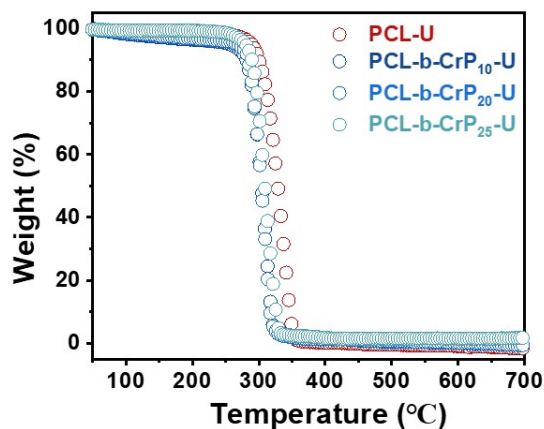

**Fig S4.** The TGA curves of PCL-b-CrP-U samples.

**Table S4.** The data of TGA curves of PCL-b-CrP-U samples.

| Samples                    | $T_{5\%}$ (°C) | $T_{max}$ (°C) |
|----------------------------|----------------|----------------|
| PCL-U                      | 288.8          | 337.4          |
| PCL-b-CrP <sub>10</sub> -U | 255.9          | 322.4          |
| PCL-b-CrP <sub>20</sub> -U | 267.0          | 309.8          |
| PCL-b-CrP <sub>25</sub> -U | 289.5          | 306.8          |

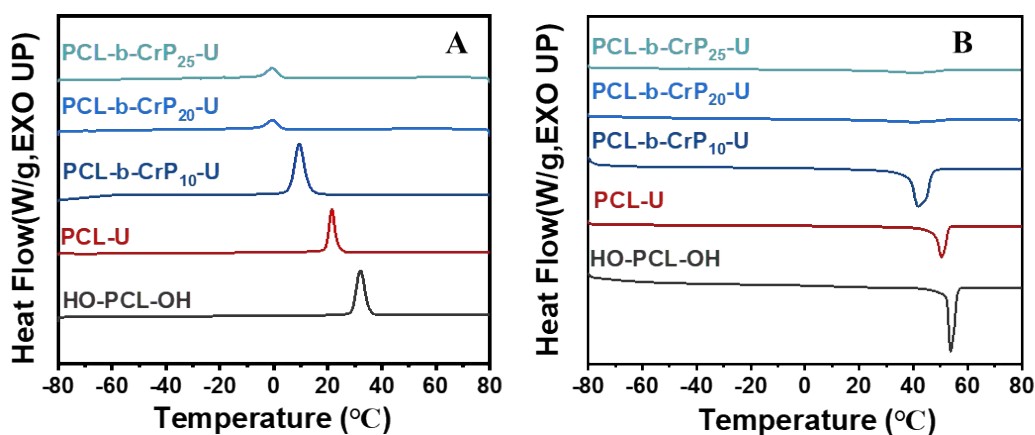

**Fig S5.** The DSC of PCL-b-CrP-U. (A): to the cooling scans; (B): the second heating scan.

**Table S5.** Thermal Characterization of PCL-b-CrP-U.

| Samples                    | $T_g^c$ (°C) | $T_m^a$ (°C) | $\Delta H_m^a$ (J/g) | $T_c^b$ (°C) | $\Delta H_c^b$ (J/g) | $T_m^c$ (°C) | $\Delta H_m^c$ (J/g) | $\chi_{c,PCL}^c$ (%) |
|----------------------------|--------------|--------------|----------------------|--------------|----------------------|--------------|----------------------|----------------------|
| PCL-U                      | -60.80       | 55.43        | 66.75                | 21.43        | 55.90                | 53.74        | 79.96                | 39.72                |
| PCL-b-CrP <sub>10</sub> -U | -58.88       | 50.56        | 71.74                | 9.24         | 53.14                | 50.31        | 55.22                | 38.98                |
| PCL-b-CrP <sub>20</sub> -U | -53.17       | 55.96        | 14.15                | -0.58        | 22.20                | 41.85        | 49.65                | 19.59                |
| PCL-b-CrP <sub>25</sub> -U | -54.14       | 45.56        | 9.158                | -0.84        | 24.28                | 40.57        | 21.96                | 19.32                |

<sup>a</sup>recorded according to the first heating scans of the DSC curves; <sup>b</sup>recorded according to the cooling scans; <sup>c</sup>recorded according to the second heating curve.

**Table S6.** Mechanical performances of PCL-b-CrP-U samples.

| Samples                    | Elasticity Modulus<br>(MPa) | Tensile strength<br>(MPa) | Elongation at<br>break (%) | Hardness<br>(HA) |
|----------------------------|-----------------------------|---------------------------|----------------------------|------------------|
| PCL-U                      | 257.1±18.0                  | 40.6±2.1                  | 3646±78                    | 69               |
| PCL-b-CrP <sub>10</sub> -U | 220.9±22.1                  | 23.0±1.9                  | 2761±62                    | 62               |
| PCL-b-CrP <sub>20</sub> -U | 40.2±2.2                    | 7.6±1.1                   | 1520±17                    | 49               |
| PCL-b-CrP <sub>25</sub> -U | 39.5±4.4                    | 7.5±0.8                   | 1401±23                    | 47               |

**Table S7.** Summary of cyclic tensile test of PCL-b-CrP<sub>20</sub>-U and PCL-b-CrP<sub>25</sub>-U in the first loading-unloading cycle.

| Samples                    | Strain (%) | Hysteresis                 |           | Elastic recovery |
|----------------------------|------------|----------------------------|-----------|------------------|
|                            |            | Value (MJ/m <sup>3</sup> ) | Ratio (%) | ratio (%)        |
| PCL-b-CrP <sub>20</sub> -U | 30         | 64.257                     | 64.81     | 70.00            |
| PCL-b-CrP <sub>20</sub> -U | 50         | 136.027                    | 67.30     | 66.01            |
| PCL-b-CrP <sub>25</sub> -U | 30         | 56.215                     | 59.51     | 71.7             |
| PCL-b-CrP <sub>25</sub> -U | 50         | 126.965                    | 63.27     | 67.3             |

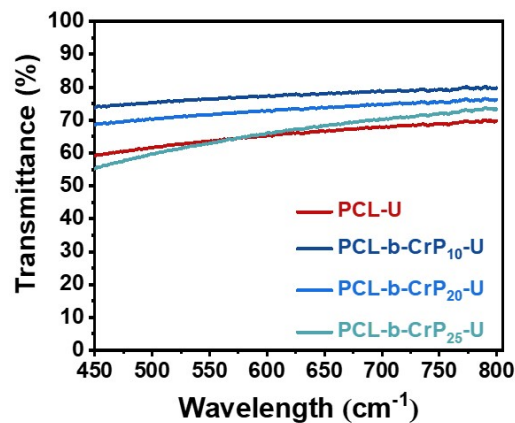**Fig S6.** The transmittance of PCL-b-CrP-U film after storage for one months at visible wavenumber.

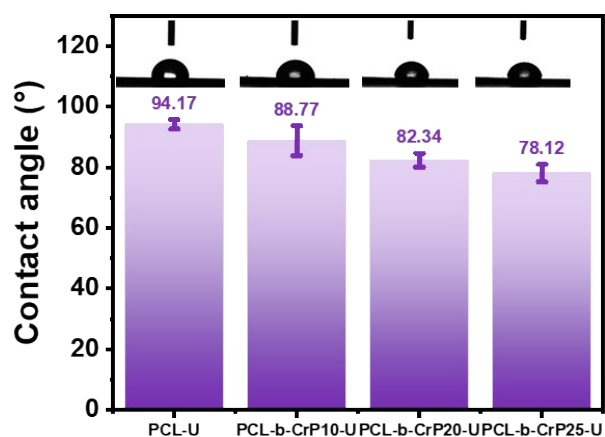

**Fig S7.** The contact angle measurements for PCL-b-CrP-U samples.

**Table S8:** The Change data of mechanical properties of PCL-U samples after degradation for 10 weeks.

| Degradation time<br>(week) | Elasticity<br>Modulus (MPa) | Tensile<br>strength (MPa) | Elongation at<br>break (%) |
|----------------------------|-----------------------------|---------------------------|----------------------------|
| 0                          | 257.6±12.2                  | 41.0±1.9                  | 364±87                     |
| 1                          | 245.1±9.6                   | 40.4±2.3                  | 3497±117                   |
| 2                          | 240.1±18.7                  | 39.1±2.1                  | 3396±287                   |
| 3                          | 207.8±21.1                  | 39.9±3.4                  | 3380±253                   |
| 4                          | 199.1±20.9                  | 38.4±2.4                  | 3297±159                   |
| 5                          | 216.7±19.9                  | 38.5±3.1                  | 3181±279                   |
| 6                          | 179.2±7.8                   | 35.6±5.8                  | 3204±199                   |
| 7                          | 172.1±11.1                  | 35.3±5.1                  | 3134±102                   |
| 8                          | 178.5±13.2                  | 32.5±4.9                  | 3160±99                    |
| 9                          | 175.9±15.1                  | 35.7±5.7                  | 3054±176                   |
| 10                         | 172.2±10.2                  | 34.2±5.9                  | 3016±232                   |

**Table S9:** The Change data of mechanical properties of PCL-b-CrP<sub>10</sub>-U samples after degradation for 10 weeks.

| Degradation time<br>(week) | Elasticity<br>Modulus (MPa) | Tensile<br>strength (MPa) | Elongation at<br>break (%) |
|----------------------------|-----------------------------|---------------------------|----------------------------|
|----------------------------|-----------------------------|---------------------------|----------------------------|



|    |           |          |          |
|----|-----------|----------|----------|
| 0  | 220.4±6.7 | 23.0±1.2 | 2761±63  |
| 1  | 215.6±5.9 | 18.9±1.1 | 1233±101 |
| 2  | 218.1±7.1 | 16.5±1.7 | 643±74   |
| 3  | 214.3±5.2 | 15.4±1.4 | 627±89   |
| 4  | 204.4±5.3 | 15.0±0.9 | 397±57   |
| 5  | 202.3±4.9 | 14.8±1.7 | 337±149  |
| 6  | 200.9±6.1 | 15.9±2.1 | 321±79   |
| 7  | 206.8±7.6 | 15.5±2.7 | 312±113  |
| 8  | 197.4±9.9 | 15.2±3.1 | 216±98   |
| 9  | 199.0±8.9 | 13.9±3.2 | 150±101  |
| 10 | 206.1±9.1 | 9.9±2.7  | 120±81   |

**Table S10:** The Change data of mechanical properties of PCL-b-CrP<sub>20</sub>-U samples after degradation for 10weeks.

| Degradation time<br>(week) | Elasticity<br>Modulus (MPa) | Tensile<br>strength (MPa) | Elongation at<br>break (%) |
|----------------------------|-----------------------------|---------------------------|----------------------------|
| 0                          | 43.6±1.6                    | 7.6±0.8                   | 1520±65                    |
| 1                          | 42.7±3.4                    | 6.0±0.5                   | 661±147                    |
| 2                          | 49.8±2.1                    | 7.1±0.7                   | 588±211                    |
| 3                          | 52.1±3.3                    | 6.0±0.5                   | 552±173                    |
| 4                          | 38.9±1.8                    | 5.7±0.3                   | 449±119                    |
| 5                          | 39.3±2.6                    | 6.6±0.6                   | 331±111                    |
| 6                          | 40.7±1.9                    | 6.1±1.1                   | 257±133                    |
| 7                          | 41.1±2.0                    | 6.7±0.9                   | 250±97                     |
| 8                          | 39.4±2.1                    | 6.0±0.8                   | 130±146                    |
| 9                          | 30.9±3.9                    | 4.6±1.2                   | 71±41                      |
| 10                         | 30.7±3.1                    | 3.5±1.4                   | 16±7                       |

**Table S11:** The Change data of mechanical properties of PCL-b-CrP<sub>25</sub>-U samples after

degradation for 10 weeks.

| Degradation time<br>(week) | Elasticity<br>Modulus (MPa) | Tensile<br>strength (MPa) | Elongation at<br>break (%) |
|----------------------------|-----------------------------|---------------------------|----------------------------|
| 0                          | 39.6±5.4                    | 7.5±1.1                   | 1401±89                    |
| 1                          | 37.4±4.7                    | 5.9±0.7                   | 702±136                    |
| 2                          | 33.9±5.1                    | 5.5±0.4                   | 625±117                    |
| 3                          | 31.2±2.2                    | 4.8±0.3                   | 487±193                    |
| 4                          | 32.6±1.9                    | 4.6±0.8                   | 312±159                    |
| 5                          | 33.1±4.1                    | 4.8±0.6                   | 101±67                     |
| 6                          | 32.4±3.7                    | 4.4±0.9                   | 84±61                      |
| 7                          | 26.8±2.6                    | 1.5±0.7                   | 9±5                        |

**Table S12:** The changes of PCL mass fraction( $\phi_{PCL}$ ) during degradation of PCL-b-CrP<sub>10</sub>-U、PCL-b-CrP<sub>20</sub>-U、PCL-b-CrP<sub>25</sub>-U.

| samples                    | $\phi_{PCL}$ (%)        |       |       |       |
|----------------------------|-------------------------|-------|-------|-------|
|                            | Degradation time (week) |       |       |       |
|                            | 0                       | 3     | 6     | 10    |
| PCL-U                      | 100                     | 100   | 100   | 100   |
| PCL-b-CrP <sub>10</sub> -U | 91.64                   | 92.01 | 92.30 | 92.69 |
| PCL-b-CrP <sub>20</sub> -U | 80.65                   | 81.13 | 81.33 | 81.73 |
| PCL-b-CrP <sub>25</sub> -U | 78.38                   | 82.54 | 82.71 | 83.03 |

$$\chi_{c, PCL}(\%) = \frac{\Delta H_m PCL}{\Delta H_{0,PCL} \times (\phi PCL)} \times 100\%$$

where  $H_m$  is the experimental melting enthalpy and  $w$  is the weight fraction of the corresponding component in the blend.  $\Delta H_{0,PCL}=139J/g$  for PCL were used according to reported enthalpy of melting of 100% crystalline PCL.

**Table S13:** The changes of PPDO and PCL content during degradation of PCL-b-CrP<sub>10</sub>-U、PCL-b-CrP<sub>20</sub>-U、PCL-b-CrP<sub>25</sub>-U.

| samples                    | PPDO content (%)        |       |       |       | PCL content (%)         |       |       |       |
|----------------------------|-------------------------|-------|-------|-------|-------------------------|-------|-------|-------|
|                            | Degradation time (week) |       |       |       | Degradation time (week) |       |       |       |
|                            | 0                       | 3     | 6     | 10    | 0                       | 3     | 6     | 10    |
| PCL-U                      | --                      | --    | --    | --    | 100                     | 100   | 100   | 100   |
| PCL-b-CrP <sub>10</sub> -U | 9.25                    | 8.85  | 8.53  | 8.10  | 90.75                   | 91.15 | 91.47 | 91.90 |
| PCL-b-CrP <sub>20</sub> -U | 21.15                   | 20.63 | 20.41 | 19.98 | 78.85                   | 79.37 | 79.58 | 80.01 |
| PCL-b-CrP <sub>25</sub> -U | 25.34                   | 19.11 | 18.94 | 18.59 | 74.66                   | 80.89 | 81.06 | 81.41 |

## REFERENCES

- 1、 A. Stjerndahl, A. Finne-Wistrand, A.-C. Albertsson, C. -M Backesjo, U. Lindgren, *J. Biomed. Mater. Res., Part A*. 2008, **87A**, 1086.
- 2、 D. -D. Yang, C. Wu, G. Wu, S. -C Chen, and Y. -Z. Wang, *Macromolecules* 2021, **54**, 291.
- 3、 T. Q. Wang, H. -Z. Zhao, Y. Liu, J. -Y. Hao, *J. Appl. Polym. Sci.*, 2013, 2978.
